# Supplementary material for: Synthesis of surfactant-free SnS nanoplates in an aqueous solution
Source: Royal Society of Chemistry journal article supplement (doi:10.1039/c5ra17768e), 2015-01-01
Supplement: c5ra17768e1.pdf [file c5ra17768e1.pdf]

Supporting information

## **Synthesis of Surfactant-Free SnS Nanoplates In an Aqueous Solution**

Heeseung Yang,<sup>†</sup> Chang-Eun Kim,<sup>†</sup> Anupam Giri,<sup>‡</sup> Aloysius Soon,<sup>†\*</sup> Unyong Jeong<sup>‡\*</sup>

<sup>†</sup>Department of Materials Science and Engineering, Yonsei University, 50 Yonsei-Ro,  
Seodaemun-Gu, Seoul 120-749, Korea

<sup>‡</sup>Department of Materials Science and Engineering, POSTECH, 77 Cheongam-Ro, Nam-  
Gu, Pohang, Gyeongbuk 790-784, Korea

Corresponding Authors: [ujeong@postech.ac.kr](mailto:ujeong@postech.ac.kr), [aloysius.soon@yonsei.ac.kr](mailto:aloysius.soon@yonsei.ac.kr)

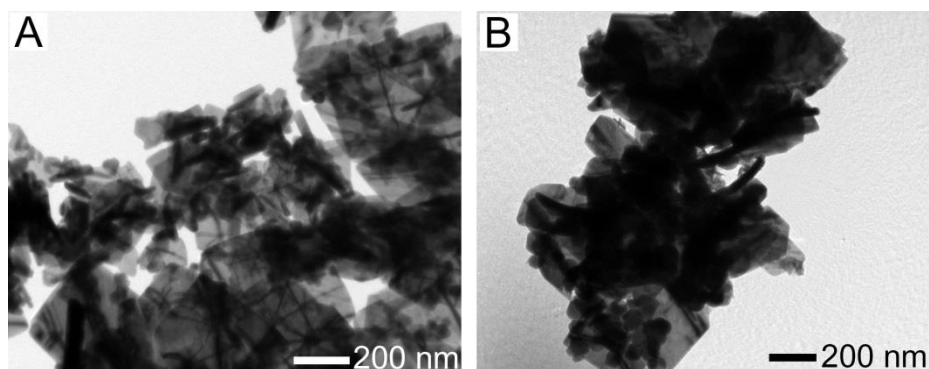

**Figure S1.** TEM images of SnS nanoplates with reaction times. (A) 20 min and (B) 240 min.

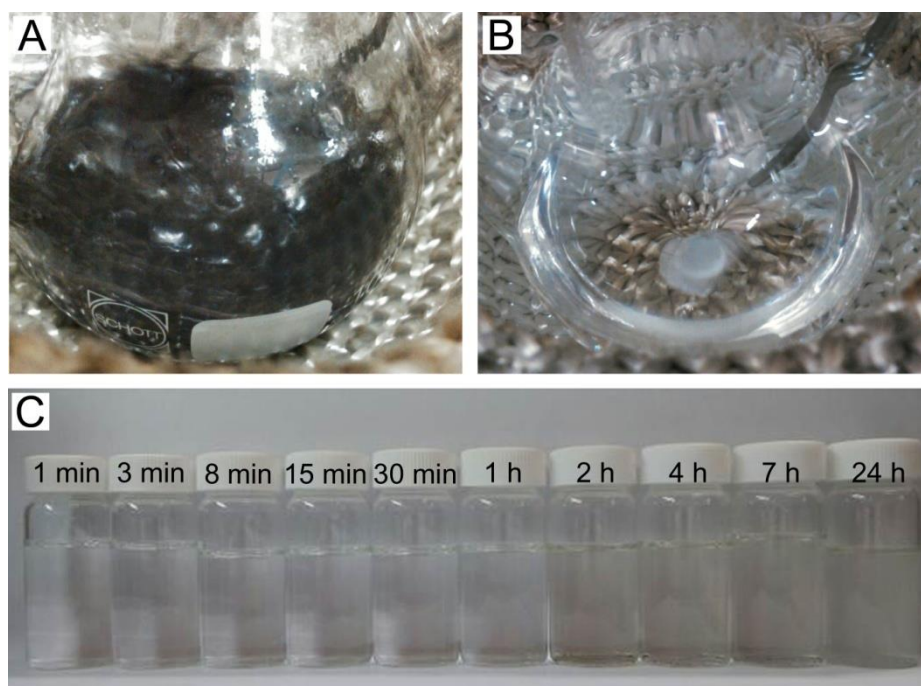

**Figure S2.** (A, B) Digital photographic images of the reaction mixture at 1 h (A) and after 24 h. (C) Digital images of the decanted supernatant of the reaction mixture after they formed  $\text{NaSn}(\text{OH})_3$  salt. The times in the image indicate the reaction times of chemical transformation from  $\text{Sn}_6\text{O}_4(\text{OH})_4$  into SnS. The SnS nanoplates were etched out as the chemical transformation reaction was longer, hence the supernatant solution from longer reaction time resulted in more  $\text{NaSn}(\text{OH})_3$  salt and look more turbid.

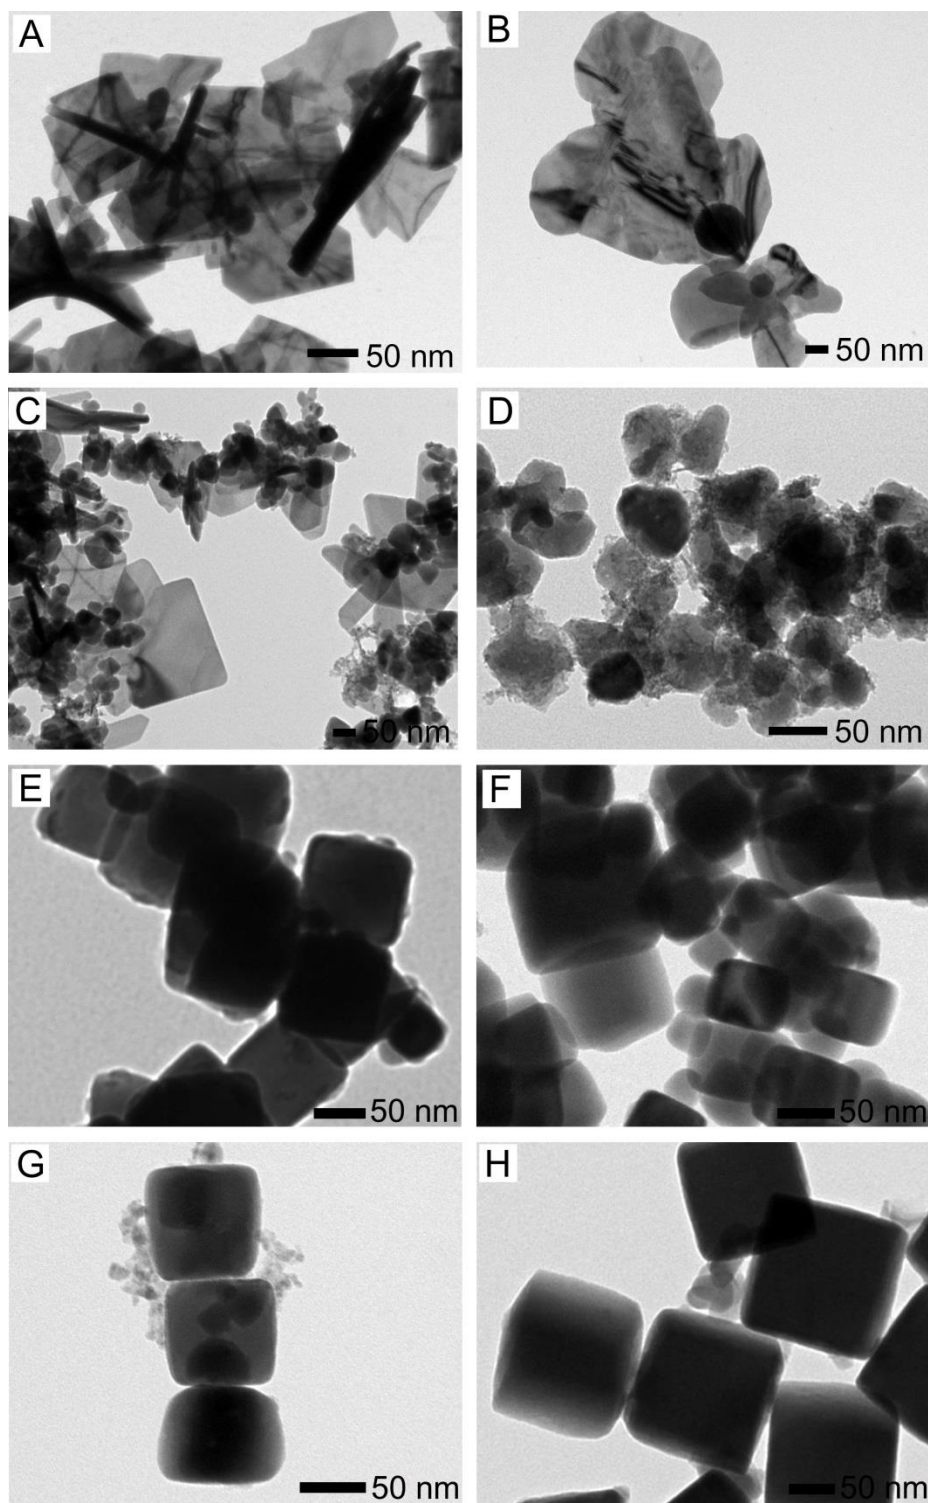

**Figure S3.** TEM images as different amount of PVP condition effect with same reaction time for 1 hour. (A) 0.005 wt %, (B) 0.01 wt %, (C) 0.03 wt %, (D) 0.05 wt %, (E) 0.1 wt %, (F) 0.3 wt %, (G) 0.5 wt %, and (H) 1.0 wt % of PVP solution, respectively.

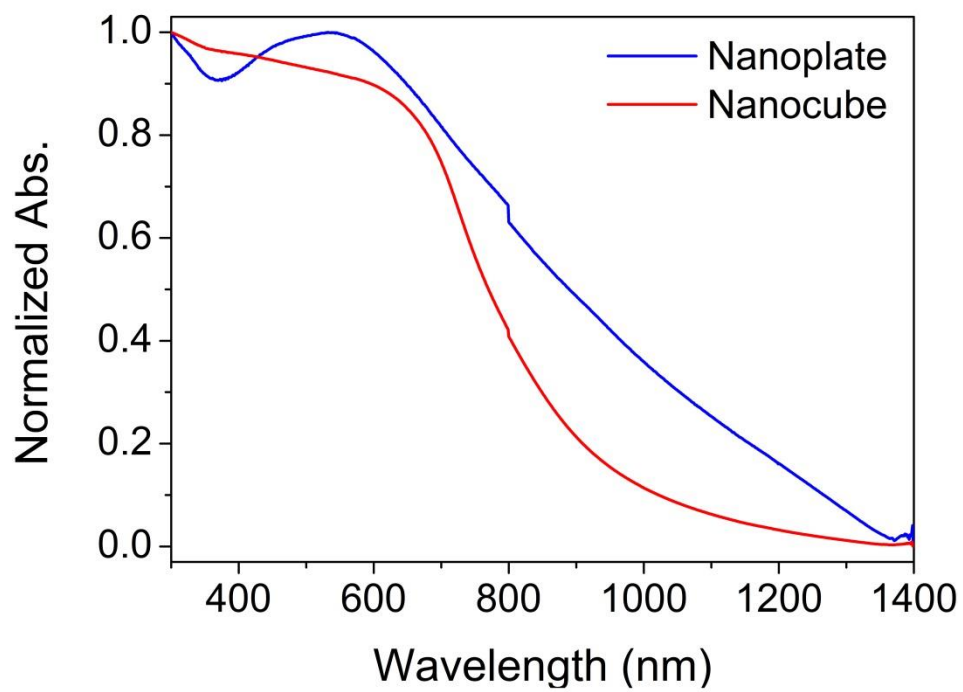

**Figure S4.** UV-vis-NIR absorption spectra of the nanocubes and nanoplates of SnS.
